# Supplementary material for: Development of a Peer Support Mobile App and Web-Based Lesson for Adolescent Mental Health (Mind Your Mate): User-Centered Design Approach
Source: PubMed Central journal article supplement (PMC9187963; doi:10.2196/36068), 2022-05-27

Very  
broad  
themes

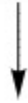

Moderate  
themes

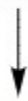

Narrow:  
First person  
sentences,  
separates  
nuanced answers

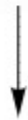

Open ended  
survey  
responses  
copy pasted

Socialising

Enjoyable

Intuitive use

Socialising

Entertainment

Relaxtion

Intuitive use

Indirect socialising: These apps let me see what others are up to.

Direct socialising: These apps let me interact with others.

These apps entertain me.

These apps help me relax.

These apps are intuitive to use.

Can listen to music, talk to people, see what other people are doing.

Talking to my friends Staying incontact

relatable content, make me laugh, contact friends, listening to songs help me cope with things that are going on with my life, able to relax

They allow me to talk to friends and let me see content that is posted by other users. I can also listen to music which helps me relax.

How simple and straight forward they are. The fact the app is free and I can use it with my friends.

My friends are on it so I can see what they are up to. Very addictive game.

My favourite things about these apps is that you able to check in on your mates and see how they are going and what they are doing. Also I like to listen to music.

I love tiktok because I understand the humor and it is easy digestible content that makes me laugh, the convenience to unlike other and is very funny content. I like spotify because I can customize my taste and find things I would never normally listen to. I like messenger cause I can talk to my friends.

Easy to use, they have enjoyable purpose, they help me relax.

choice and having interest. they are generally the same cause across both apps to make the same thing. "x" is used to indicate creating a new link. YouTube that it has both generally popular videos and videos that are catered towards the phone simple categories (e.g. contacts, etc.) making it easy to understand

Everyone's using it

You can interact with people

they are social, keep me entertained

stay connected with friends, relatable content, makes me laugh, listening to songs helps me stay calm and focused especially when going through struggles, reading allows me to expand my imagination.

The accessibility that they give you to others and online resources, how smooth and well developed the technology is.

it helps me connect and communicate with other people when I am not around them.

Fun to spend time on, allows me to interact with other people

They provide entertainment (e.g. Instagram, YouTube, Spotify, Safari) and social connection (e.g. Instagram, Messages).

I'm able to communicate with my friends that are either in a different state or country. Some apps just let me enjoy and relax

Watch others' lives, videos about games and sports and stuff.

With snapchat you can talk to mates whenever. Facebook you can scroll through content whenever. Instagram you can see what friends have been doing by what they post. Messenger chats to mates whenever. TikTok look at random people's videos.

I'm am able to communicate with my friends and also it's also a good source of entertainment when I am alone.

They provide a wide array of content, including entertainment (first four apps), fun education (from YouTube), and convenience (WhatsApp messaging and Bible app).

Interruptions to use

Uncertainty in use

Requires resources

Advertisement interruptions

Inability to use

Uncertainty in use

Requires resources

Ads are annoying.

Glitches are annoying.

Uncertainty in how to use the app is annoying.

Apps that strain internet/data connection are annoying.

Apps that require battery power or keep me on them long enough to drain battery are annoying.

Ads

Phone glitching out

Sometimes these apps can provide us with unnecessary information. Also some apps take are 4 longer and harder to use.

When the wifi isn't working properly so the app lags.

my phone battery drains VERY quickly when using tik Tok and the battery life has decreased i don't like how some apps don't have a dark mode

When games send you stuff that you don't care about. They also come up with ads which is annoying.

when they crash, on the YouTube app when you can't have multiple videos open at the same time

They might crash, or glitch and they sometimes are not clear in how a process should be done, not being able to do simple tasks such as log out.

Glitching, being really slow, Ads

they are addicting therefore using up my data.

pop up ads or ads in general.

Like when you're going for your highest score then you die. Sometimes snapchat just logs out randomly.

They are distractions sometimes

Bugs, INternet too slow

sometimes can be glitching, uses up battery life.

Some of the ads that I face when using the app.

Sometimes the app crashes/lags, or glitches.

Glitches, Ads, when the apps start to slow down.

glitches, how long I spend on the app, battery loss

Advertisements, angry commenters

Sometimes it lags or glitches which can be annoying to fix.

ads, needing to pay money, functions don't work unless you pay, uses heaps of data

Glitches out, music doesn't download, new look updates.

Third party support

How to have a conversation

Best ways to help

Third party support

How to have a conversation

How to help

Offering help.

Professionals are helpful.

Someone who knows my friend is helpful.

I'm unsure of HOW to approach my friend.

I'm unsure of WHAT to say to my friend.

My plan would be to talk to my friend.

Seeing a counsellor to get professional help/analysis on the friend's issue based on their symptoms and actions.

someone to give me advice when the situation is occurring

I think it would've been helpful to know what the appropriate thing to say to them was and other ways that I could help and support them.

basic methods on how to help them or someone who was giving advice and helping me to help them.

If I went up to him and asked if he was alright. I could asked if there was anything I could do to help.

Someone telling me that it isn't always entirely my responsibility to help them and being able to reach out to other people who have more experience or knowledge than me and are probably better equipped to help them.

Another person knowing what I knew about that friend.

if I had known different ways to comfort them or be able to have the knowledge on what I can do

Clear, useful tips

Reaching out and asking whether they were okay or not, and if there was anything I could do to help them move through it.

To pray for them and maybe to have spoken to their parents about what was going on.

To know helpful questions and ways to talk to them.

Support-making sure they were ok

To go up to him and just say I'm here if you need to talk.

Someone responsible and understanding of the situation to be able to talk it out with

It would be helpful if someone could tell me how I should approach my friend because I don't really know whether if I will say something that may trigger something and make the situation worse.

That I should've confronted them about the problem and how they're acting a bit off and whether they're truly okay even when they deny it.

an adult, a parent. Time to get away and distract them from the problem.

date of ed is always a stressful time and many panic attacks and breakdowns occur and I think looking back I should have talked to my friend in a manner that was calming and approached the situation with some forethought into what they were going through

One time one of my friends wasn't talking to me as much so I was worried. Something that would of help was checking in on them and seeing how they were going.

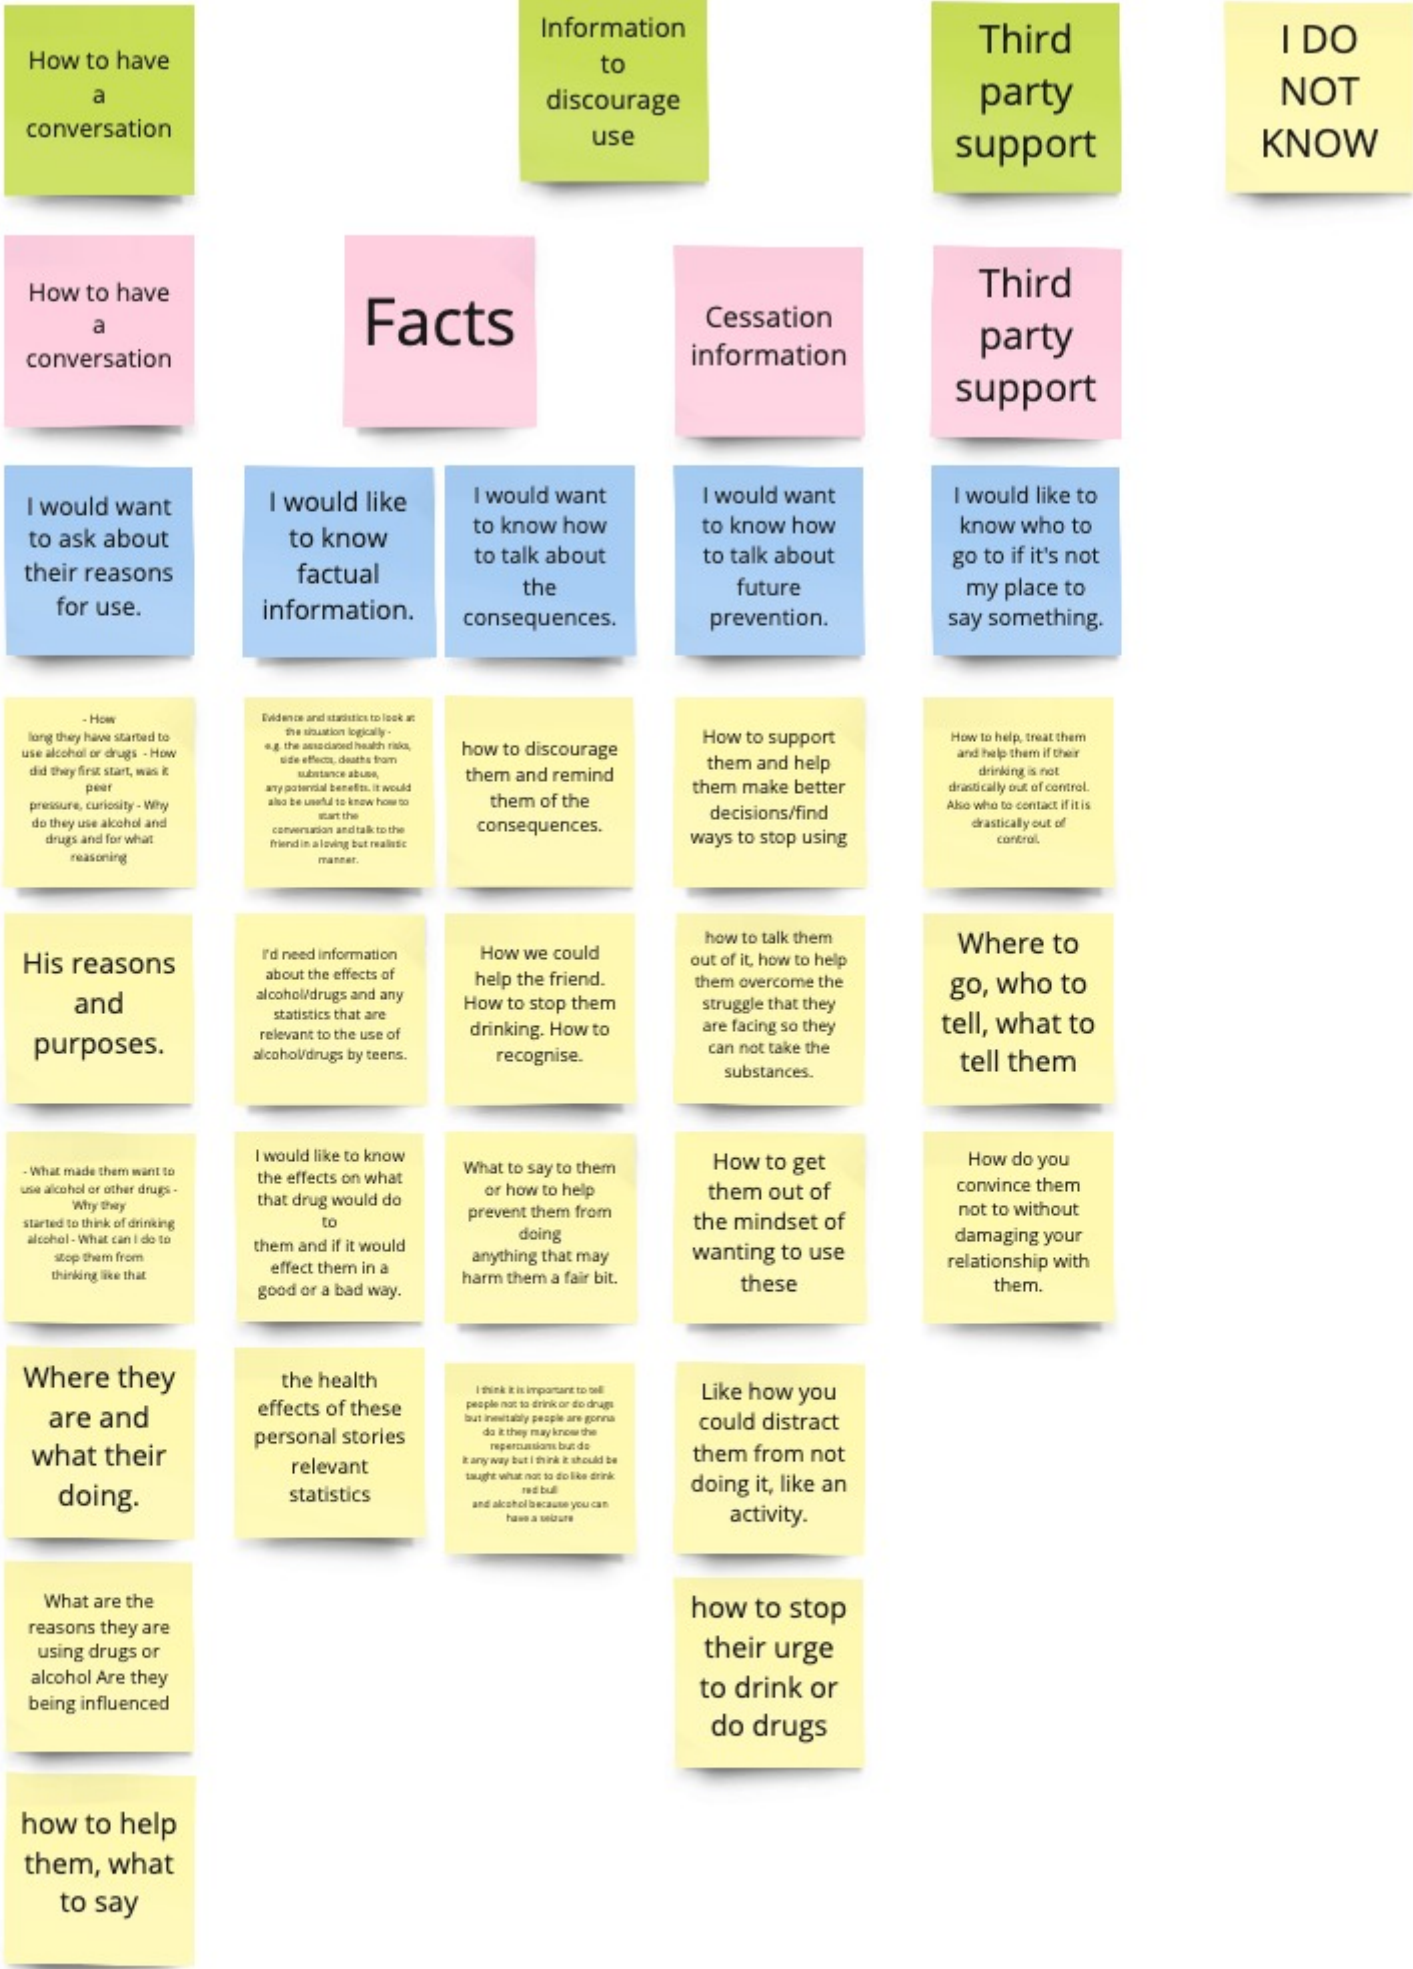

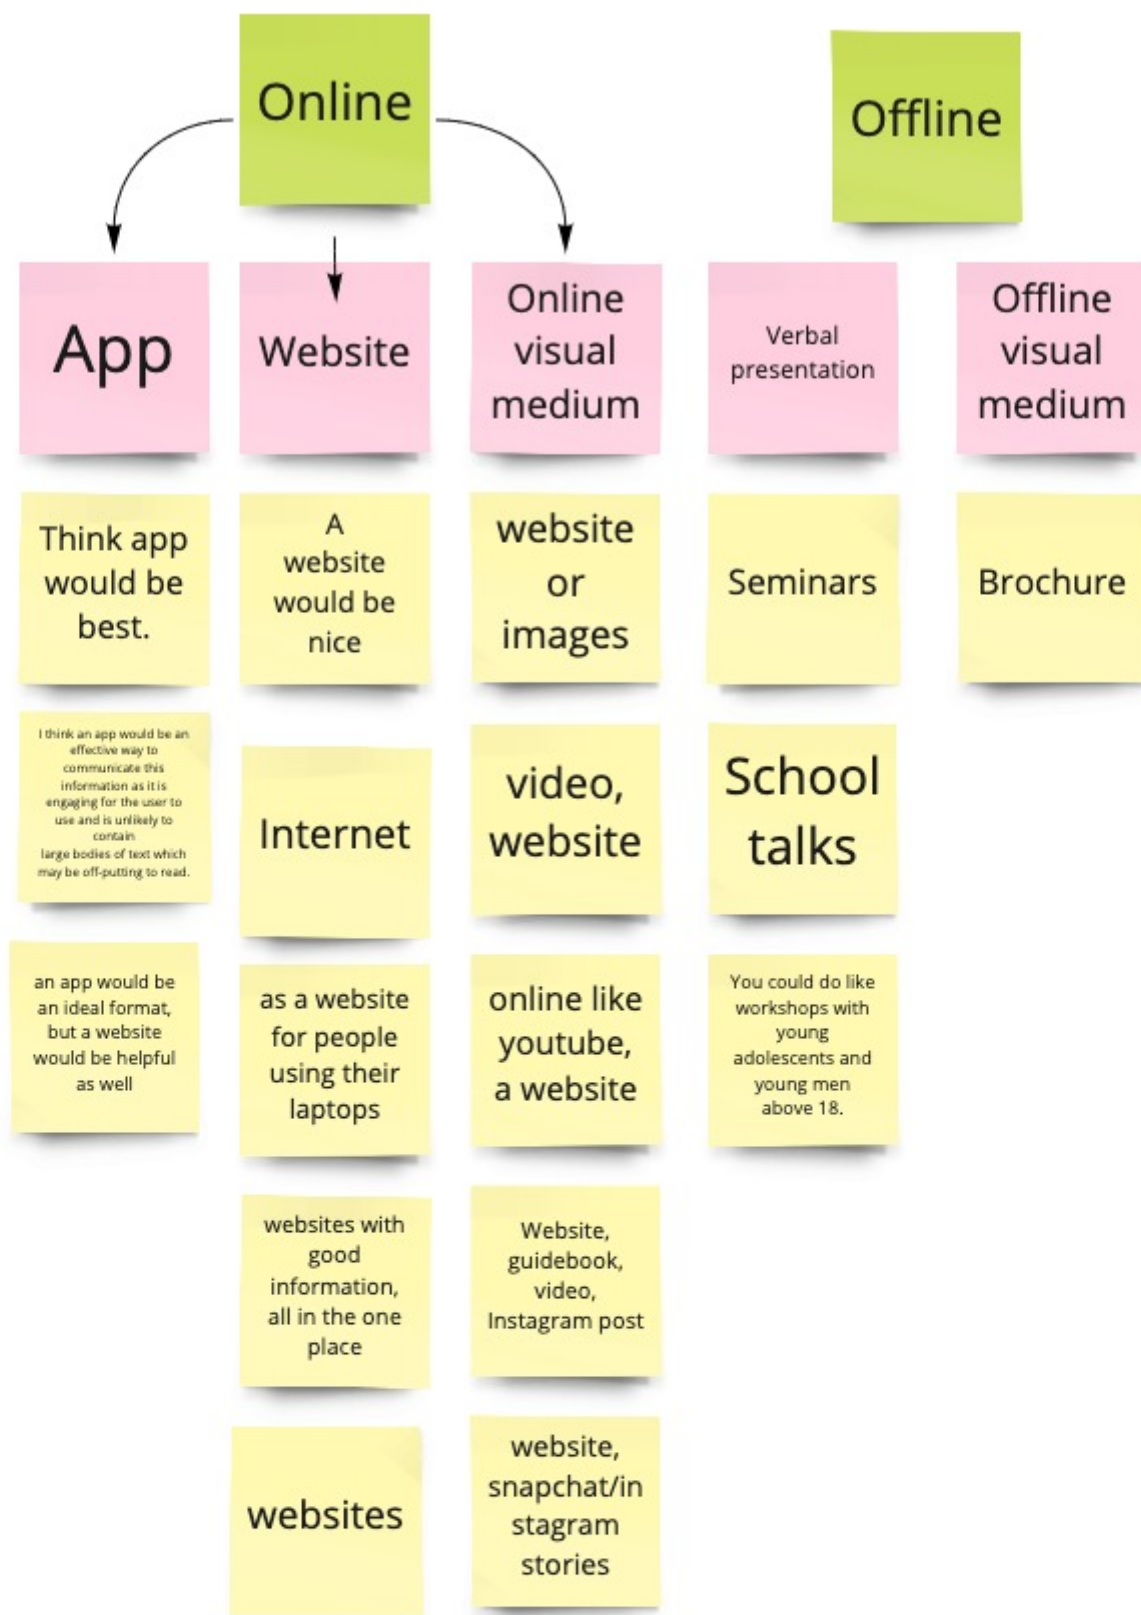

Supplement: formative_v6i5e36068_app3.pdf [file formative_v6i5e36068_app3.pdf]
